# Supplementary material
Source: publisher site journal article supplement (https://www.dovepress.com/get_supplementary_file.php?f=370645.docx)
Supplement: Supplementary file 1 [file get_supplementary_file.php]

# Appendix A

**Student Survey**

Q0. I have read the Informed Consent Form and I agree to participate in this survey.

o Yes

o No

If you would like to enter the raffle draw, please provide your WCM-Q CWID (This will be kept confidential and is used only for entry into the raffle draw)

**Demographics**

Q1. Age

Q2. Sex

o Male

o Female

Q3. Class

o Class of 2022

o Class of 2023

**Attitudes & Perceptions**

It is said that "to be a physician is to lead" (Rotenstein et al., 2018).

According to the Harvard Business Review, "Medicine involves leadership. Nearly all physicians take on significant leadership responsibilities over the course of their career, but unlike any other occupation where management skills are important, physicians are neither taught how to lead nor are they typically rewarded for good leadership. As more evidence shows that leadership skills and management practices positively influence both patient and healthcare organization outcomes, it’s becoming clear that leadership training should be formally integrated into medical and residency training curricula".

Rotenstein, L. S., Sadun, R., & Jena, A. B. (2018, October 17). *Why doctors need leadership training*. Harvard Business Review. https://hbr.org/2018/10/why-doctors-need-leadership-training

Based on your reflections on the above passage and experience in medical school, please answer the following questions.

Q4. Leadership is a core competency that is required to succeed in the medical profession.

o Strongly agree

o Somewhat agree

o Neither agree nor disagree

o Somewhat disagree

o Strongly disagree

Q5. What is your understanding of leadership as a core competency in a physician? (Please check all that apply)

o Leadership encompasses important skills such as decision-making, communication, empathy, etc., which are all required in a physician.

o Leadership skills do not need to be intentionally taught in medical school as the curriculum adequately prepares the students.

o Leadership development is beneficial for ONLY those who wish to pursue leadership roles in their medical career.

o Leadership in a physician relates to the ability to lead and supervise daily activities of patient care as well as educate junior doctors.

o Other (please specify below)

Q6. Being a physician and being a leader go hand in hand.

o Strongly agree

o Somewhat agree

o Neither agree nor disagree

o Somewhat disagree

o Strongly disagree

Q7. Leadership skills are adequately taught to medical students at WCM-Q.

o Strongly agree

o Somewhat agree

o Neither agree nor disagree

o Somewhat disagree

o Strongly disagree

Q8. Where do you think leadership training (implicit or explicit) takes place in your medical curriculum? (Please check all that apply)

o PBLs

o Case-Based Discussions (in lecture halls)

o Lectures

o Clerkships

o AOC/Research Endeavors

o Club organizations

o MSEC positions

o Other (please specify below)

Q9. Leadership skills could be better assessed* in our curriculum (Feel free to elaborate on the reasoning behind your choice).

**assessment could mean general comments and/or feedback (graded or ungraded) from preceptors during clerkships, professors in PBLs, mentors and advisors, clerkship directors, etc.*

o Strongly agree, why?

o Somewhat agree, why?

o Neither agree nor disagree, why?

o Somewhat disagree, why?

o Strongly disagree, why?

Q10. Please choose the option that best indicates your attitude towards the following statements.

|  | Attitude |
| --- | --- |
|  |  |
| There is no room for leadership training in the medical curriculum. | ▼ Strongly agree (1 ... Strongly disagree (5) |
| There are obstacles for students to engage in leadership training in the medical curriculum. | ▼ Strongly agree (1 ... Strongly disagree (5) |
| Leadership skills are taught across multiple courses/units and are unified across the curriculum. | ▼ Strongly agree (1 ... Strongly disagree (5) |
| Students have an appropriate level of responsibilities during clerkships and clinical activities. | ▼ Strongly agree (1 ... Strongly disagree (5) |
| The responsibilities given to students during clerkships prepare them to be better leaders. | ▼ Strongly agree (1 ... Strongly disagree (5) |

Q11. Can you please elaborate more on your attitudes to any or all the statements? Feel free to add other insights and opinions.

________________________________________________________________

________________________________________________________________

Q12. What do you think are the obstacles, if any, facing implementation of leadership training in the curriculum? (Please check all that apply and feel free to elaborate).

o There is adequate training

o Inadequate budget

o No time (the curriculum is already packed)

o Lack of interest

o Not seen as important

o Other (please specify below)

Q13. I feel that possessing more leadership skills would improve my skills as a physician (Feel free to elaborate).

o Strongly agree

o Somewhat agree

o Neither agree nor disagree

o Somewhat disagree

o Strongly disagree

Q14. I feel that the medical curriculum prioritizes leadership training to prepare us to be effective physicians.

o Strongly agree, why?

o Somewhat agree, why?

o Neither agree nor disagree, why?

o Somewhat disagree, why?

o Strongly disagree, why?
